# Supplementary material for: Omicron sub-lineage BA.5 infection results in attenuated pathology in hACE2 transgenic mice
Source: PubMed Central journal article supplement (PMC10499788; doi:10.1038/s42003-023-05263-6), 2023-09-13
Supplement: 42003_2023_5263_MOESM2_ESM.pdf [file 42003_2023_5263_MOESM2_ESM.pdf]

1 Supplement figure legends

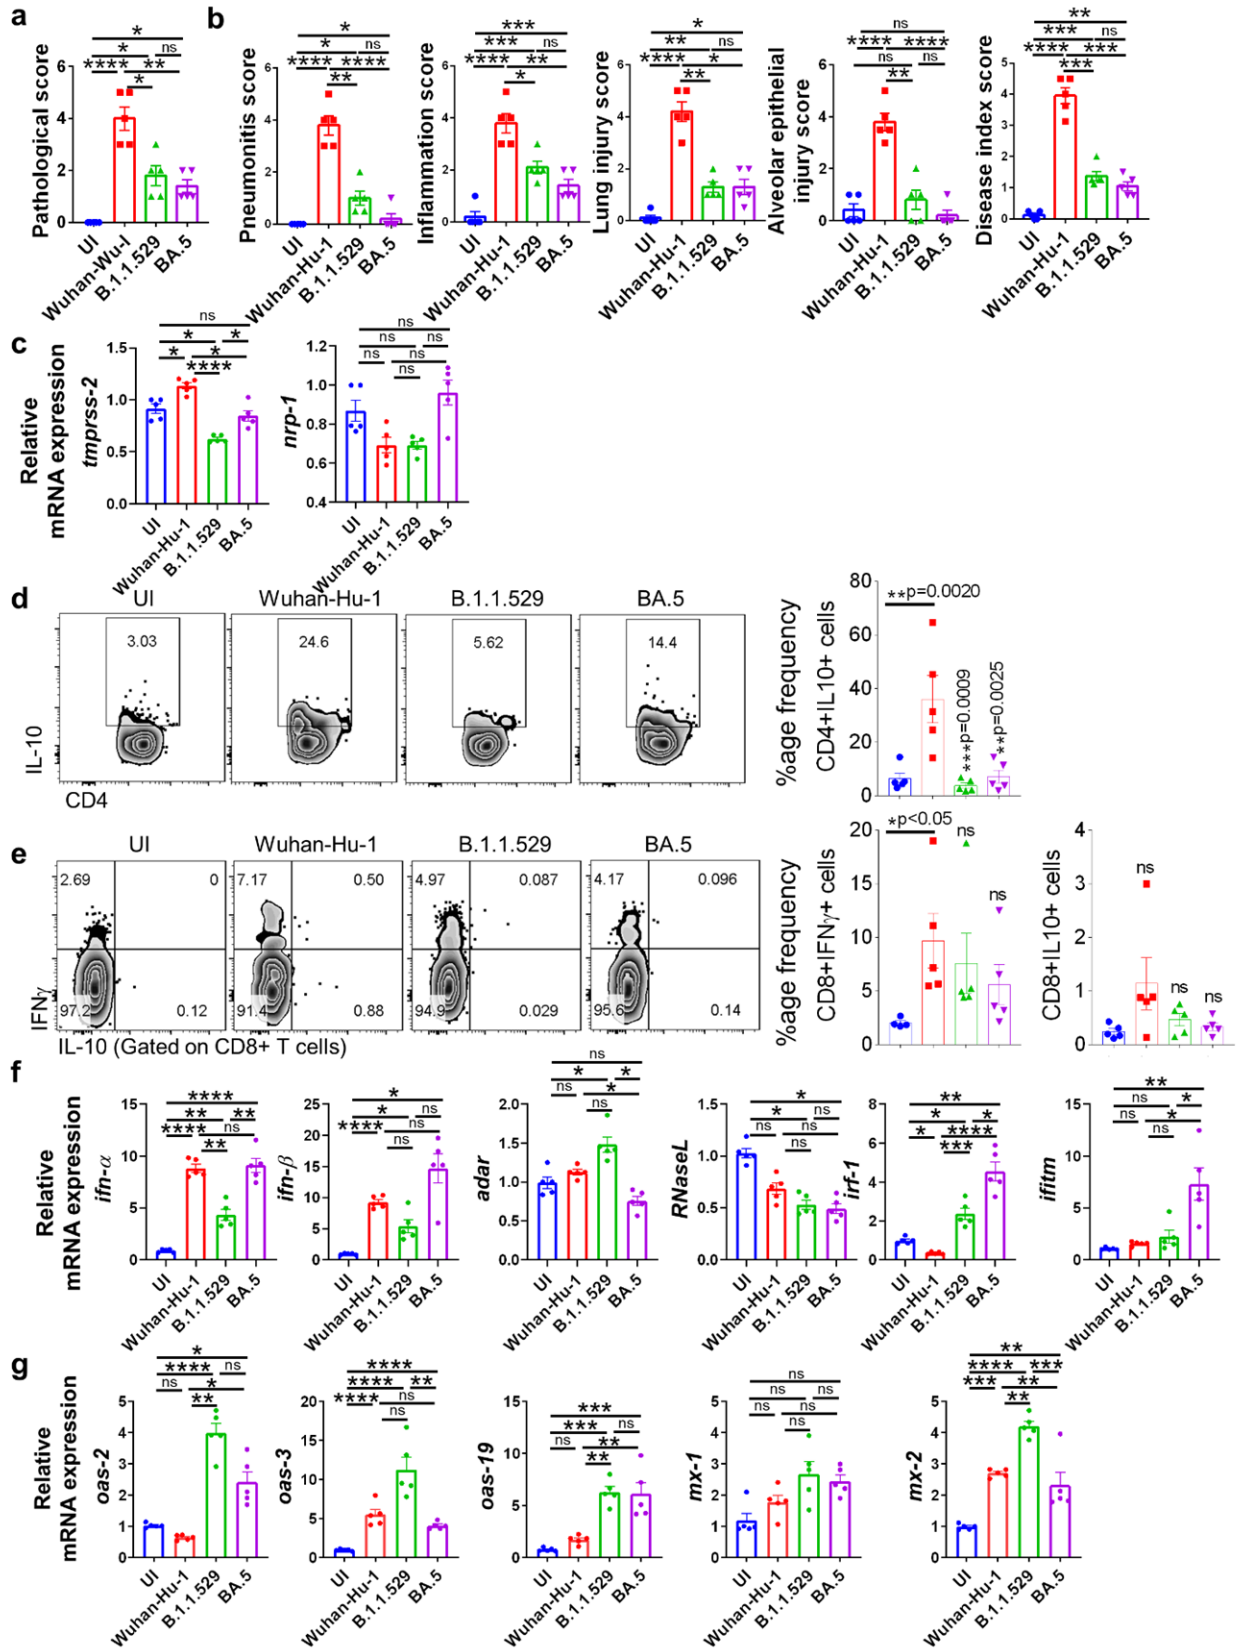

2

3 Supplement Fig. 1. Characterization of immunopathology of BA.5 infection hACE2.Tg

4 **mice.** Random blind assessment of the HE stained lung sections were done by a trained  
5 pathologist for different challenge groups and were given pathological scores based on a scale  
6 0 to 5 (where 0 meant no feature and 5 meant highest pathological feature). (a) Bar graph  
7 showing mean  $\pm$  SEM score for lung pathological features and disease index score calculated  
8 as the average of all features for that animal. (b) mRNA expression of nrp-1 & temprss-2 genes  
9 from the lung samples. (c) intracellular cytokines levels of IL-10 producing CD4<sup>+</sup> T cells (d)  
10 or IFN $\gamma$ / IL-10 producing CD8<sup>+</sup> T cells in the BALF. (e) Relative mRNA expression of (f)  
11 interferon stimulating genes (ISGs) and (g) anti-viral genes in the lung samples of infected or  
12 uninfected mice. For all experiment n=5. One way-Anova using non-parametric Kruskal-  
13 Wallis test for multiple comparison. ns= non-significant, \*P < 0.05, \*\*P < 0.01, \*\*\*P < 0.001,  
14 \*\*\*\*P < 0.0001.

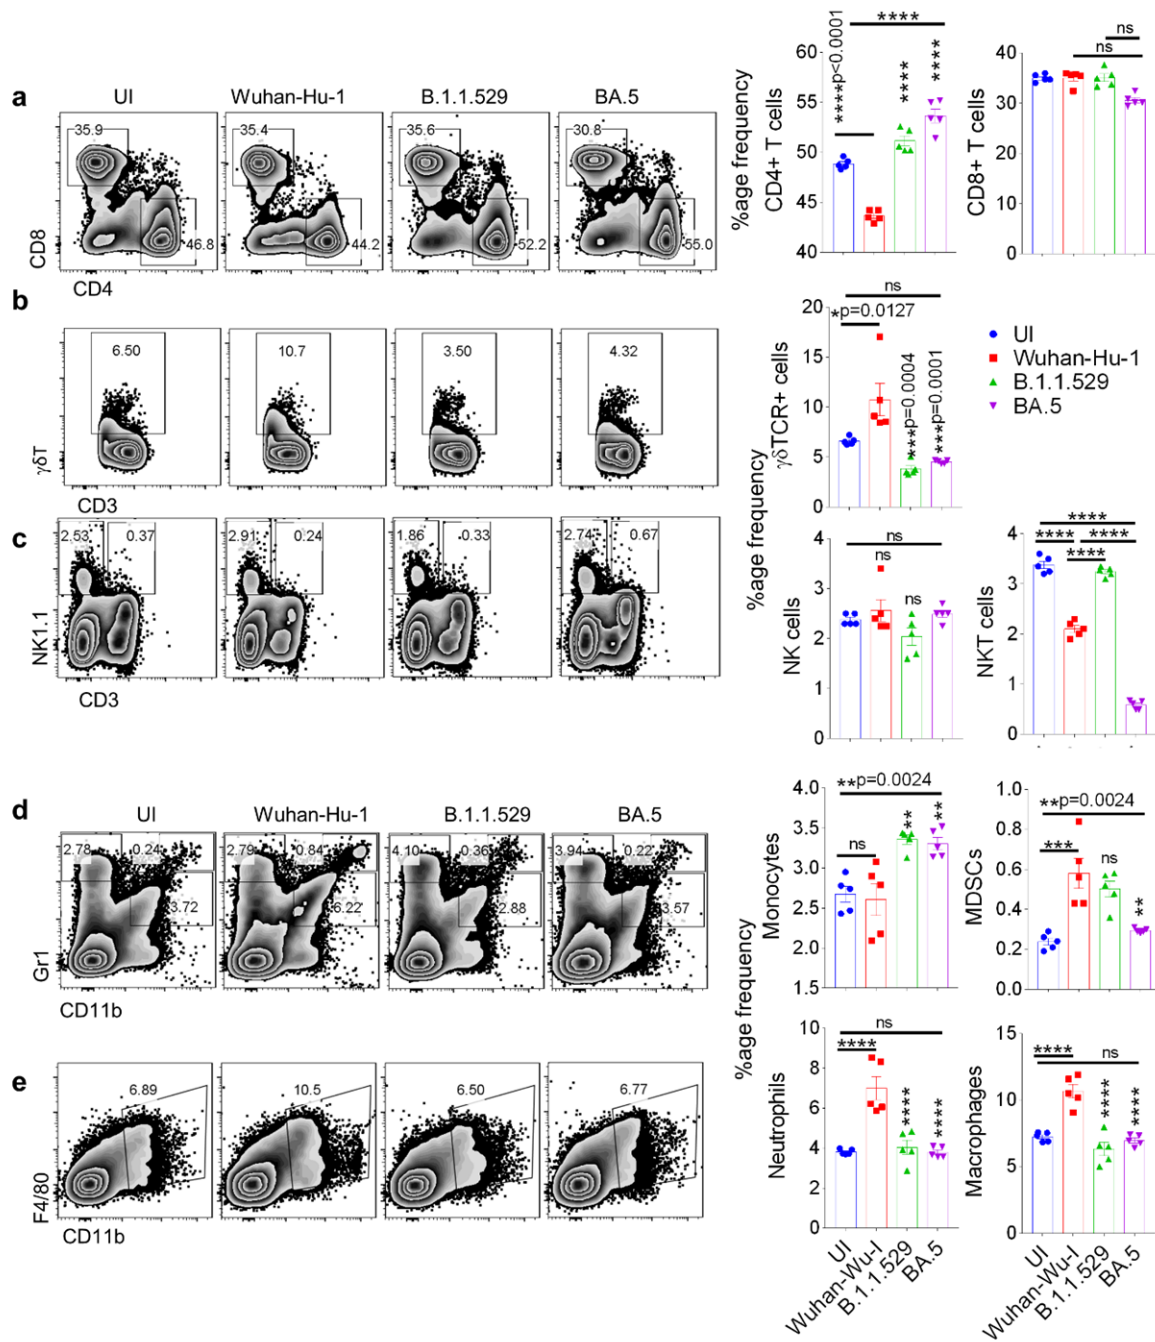

15

16 **Supplement Fig. 2. Evaluation of the immunological response in BA.5 infected mice.**

17 Splenocytes of the infected or uninfected animals were used for the (a-e) immunophenotyping  
 18 by flow cytometry to investigate the changes in the percent frequency of (a) CD4+ or CD8+ T  
 19 cells (b) γδTCR+ T cells (c) NK and NKT cells (d) monocytes, MDSCs and neutrophils and  
 20 (e) macrophages shown through representative dot plots and bar graphs. For all experiment

21 n=5. One way-Anova using non-parametric Kruskal-Wallis test for multiple comparison. ns=

22 non-significant, \*P < 0.05, \*\*P < 0.01, \*\*\*P < 0.001, \*\*\*\*P < 0.0001.

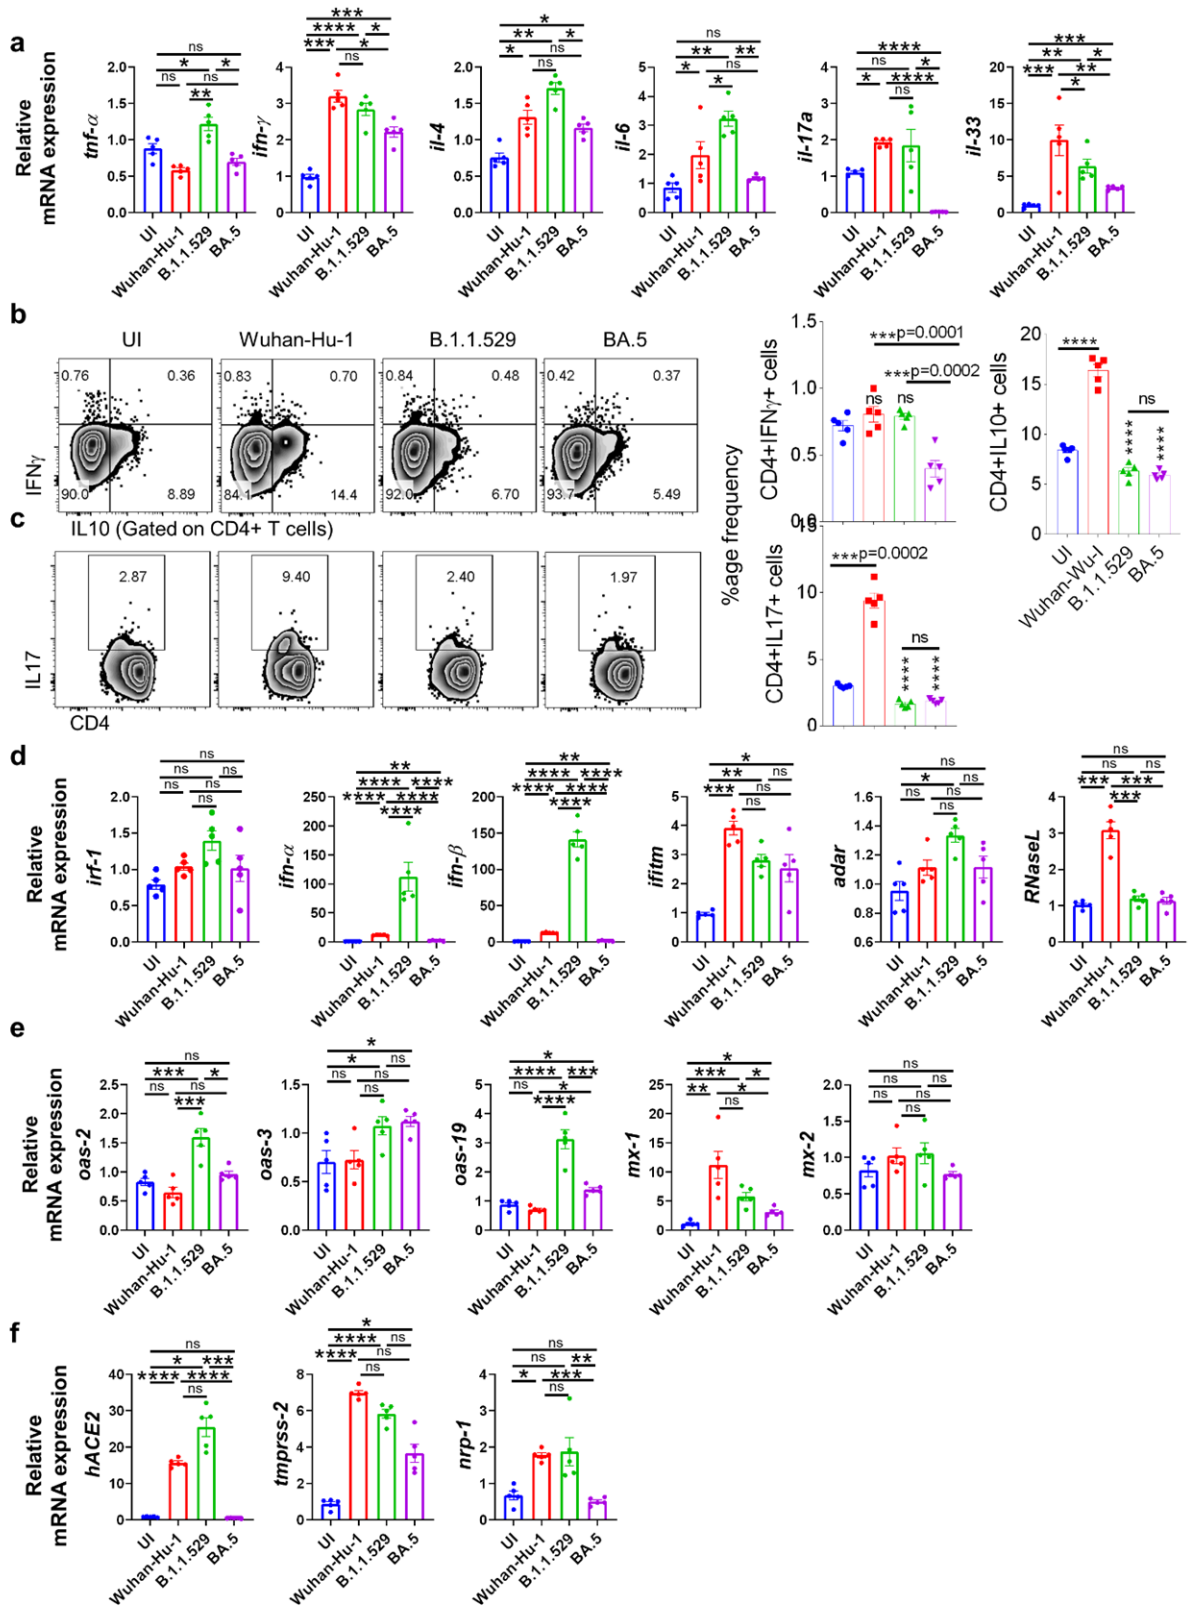

23

24 **Supplement Fig. 3. Inflammatory and anti-viral response in BA.5 infected mice**  
25 Splenocytes of the infected vs uninfected mice were used for relative mRNA expression  
26 profiling or flow cytometry to evaluate the inflammatory and anti-viral response following  
27 BA.5 infection in hACE2 transgenic mice. (a) mRNA expression of pro-inflammatory  
28 cytokines genes (b) representative dot plots and bar graphs showing mean  $\pm$  SEM of percentage  
29 frequency of IFN $\gamma$ , IL-10 or (c) IL17A producing CD4<sup>+</sup> T cells (d) relative mRNA expression  
30 of ISGs genes and (e) anti-viral genes or (f) SARS-CoV-2 host entry factors. For all experiment  
31 n=5. One way-Anova using non-parametric Kruskal-Wallis test for multiple comparison. ns=  
32 non-significant, \*P < 0.05, \*\*P < 0.01, \*\*\*P < 0.001, \*\*\*\*P < 0.0001.

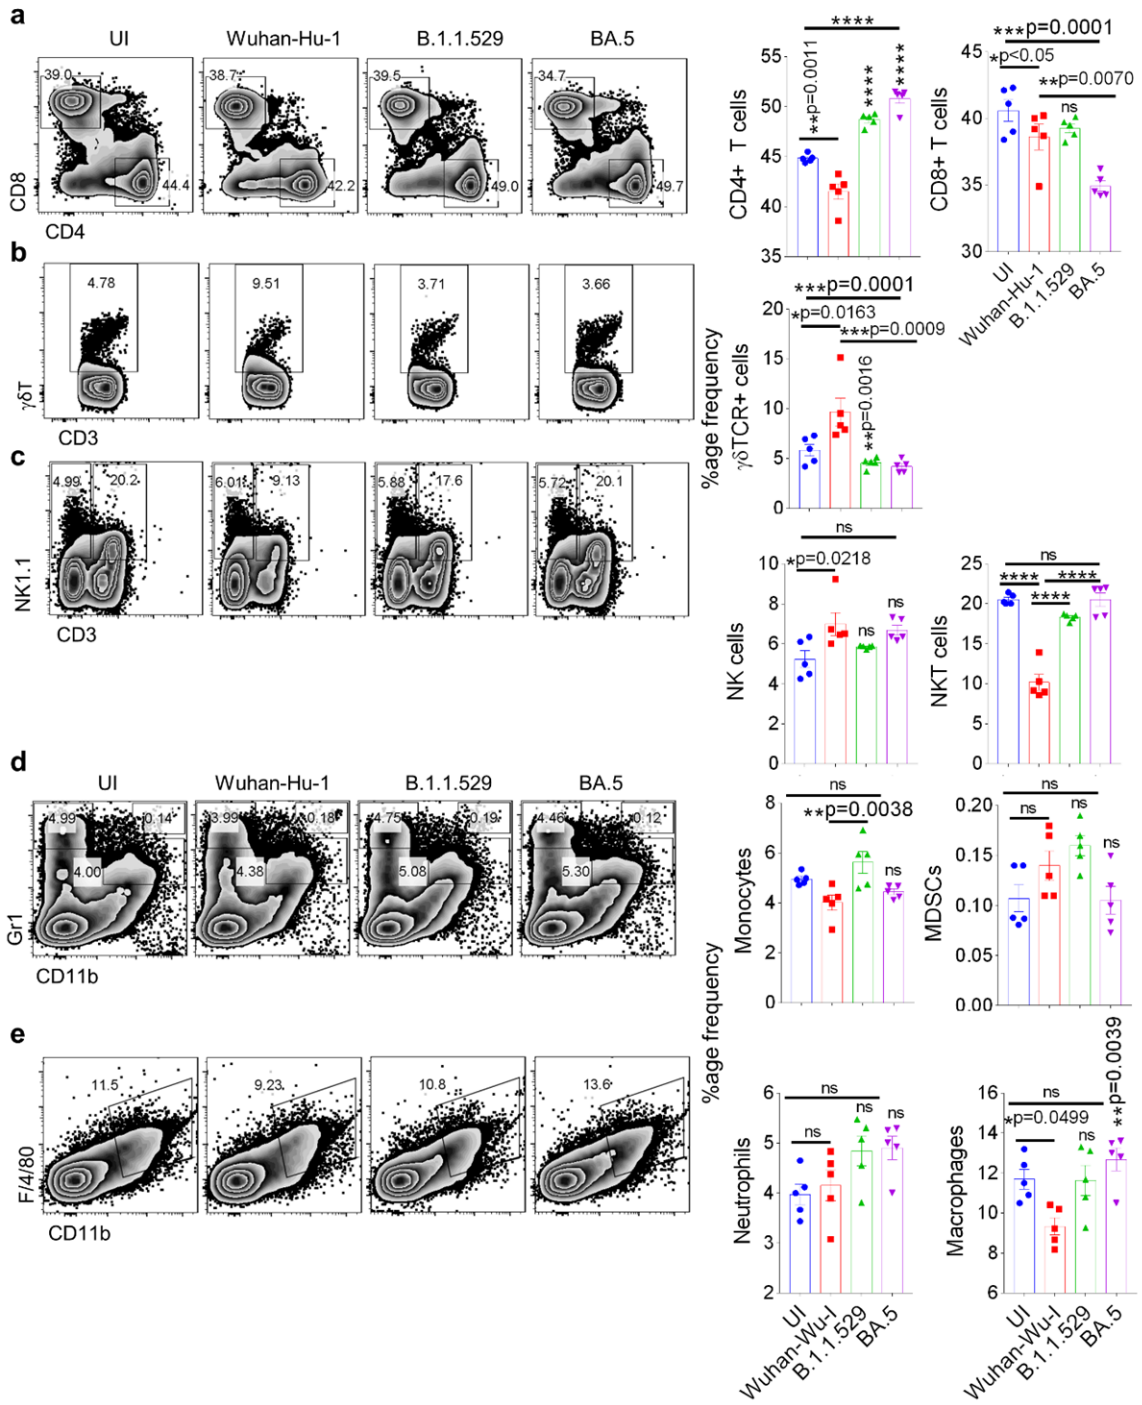

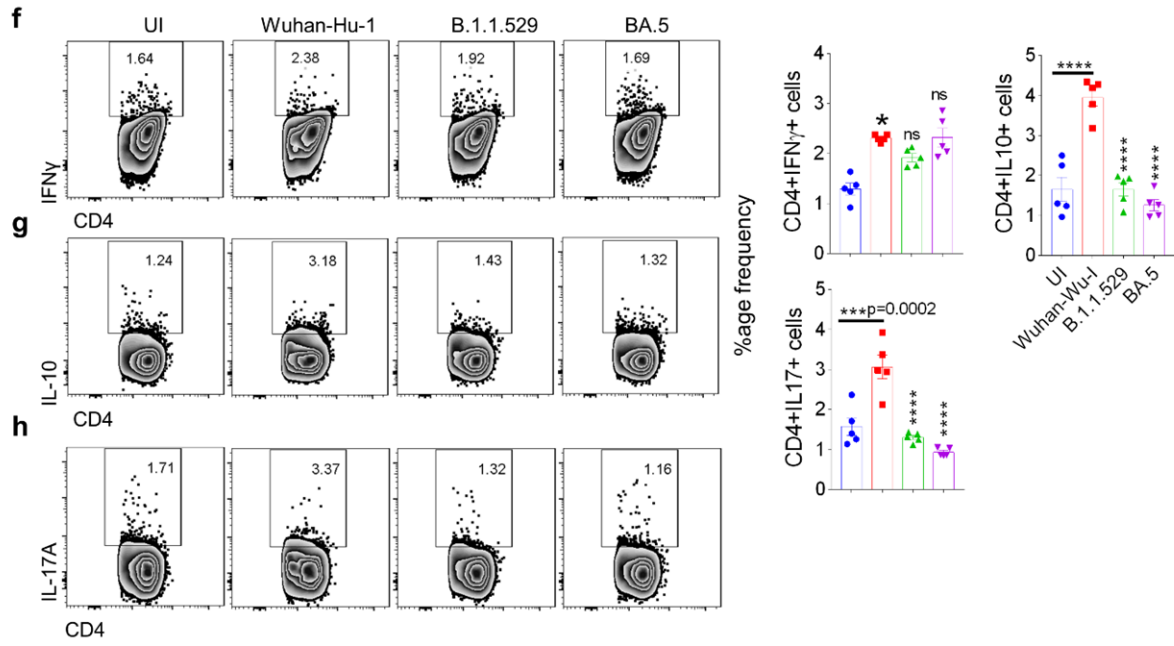

34

35 **Supplement Fig. 4. Characterization of the immunological response in the dLN of BA.5**

36 **infected mice.** Lymph nodes of the infected or uninfected animals were used for the  
 37 immunophenotyping assessment by flow cytometry to investigate the changes in the percent  
 38 frequency of (a) CD4+ or CD8+ T cells (b)  $\gamma\delta$ TCR+ T cells (c) NK and NKT cells (d)  
 39 monocytes, MDSCs and neutrophils and (e) macrophages (f) IFN $\gamma$ , (g) IL-10 or (h) IL17A  
 40 producing CD4+ T cells. For all experiment n=5. One way-Anova using non-parametric  
 41 Kruskal-Wallis test for multiple comparison. ns= non-significant, \*P < 0.05, \*\*P < 0.01, \*\*\*P  
 42 < 0.001, \*\*\*\*P < 0.0001.

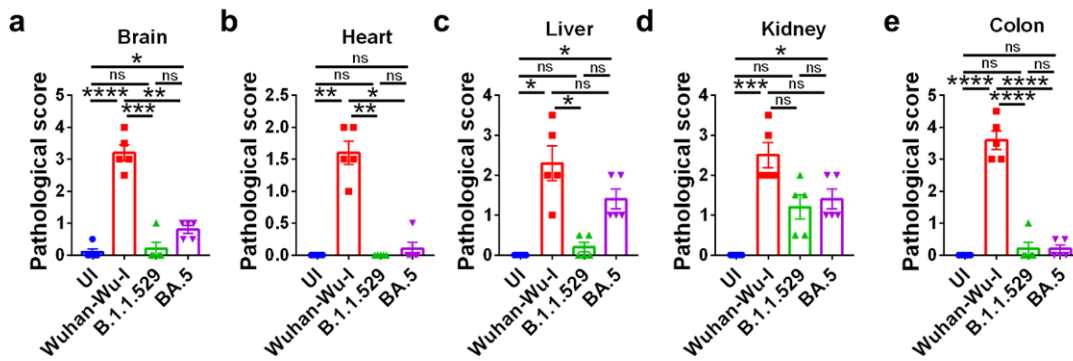

43

44 **Supplement Fig. 5. Pathological scores for extra-pulmonary manifestations induced by**

45 **BA.5 infection.** Random blind assessment of the HE stained sections of major organs: (a) brain  
46 (b) heart (c) liver (d) kidney (e) colon was done by a trained pathologist for different challenge  
47 groups and were given cumulative pathological scores which included inflammation, based on  
48 a scale 0 to 5 (where 0 meant no feature and 5 meant highest pathological feature). For all  
49 experiment n=5. One way-Anova using non-parametric Kruskal-Wallis test for multiple  
50 comparison. ns= non-significant, \*P < 0.05, \*\*P < 0.01, \*\*\*P < 0.001, \*\*\*\*P < 0.0001.



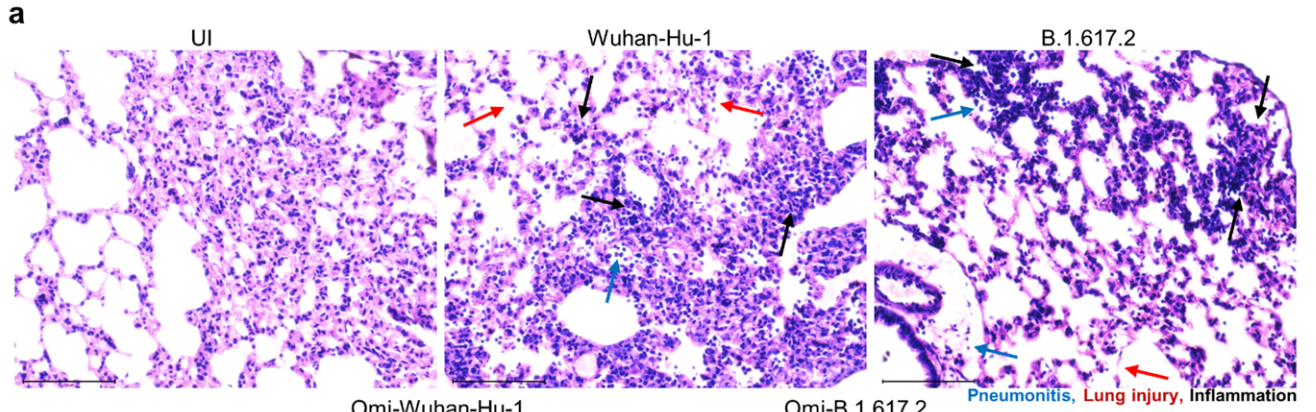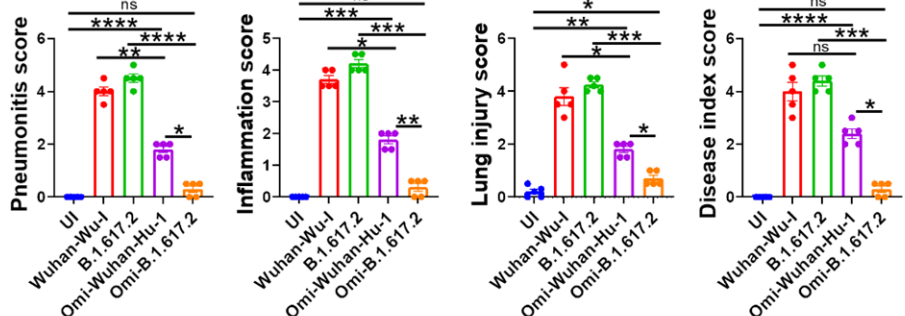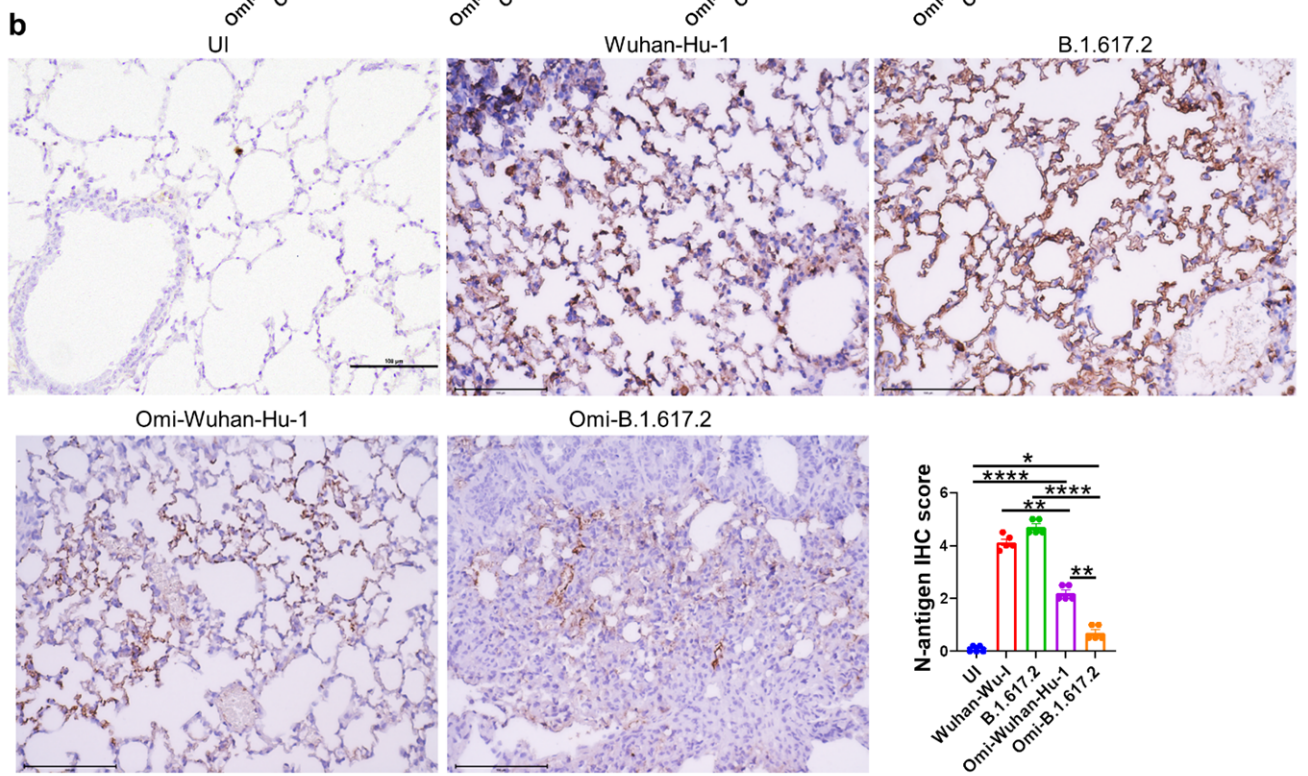

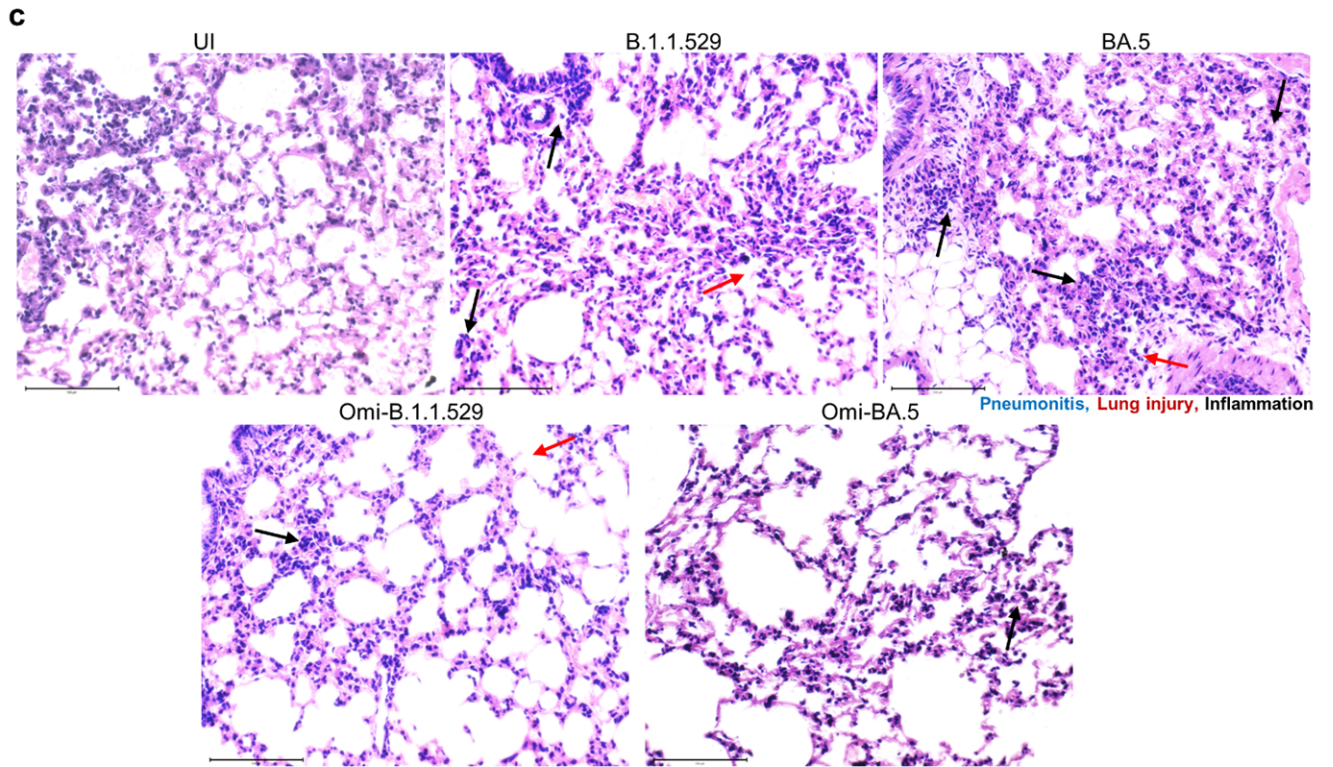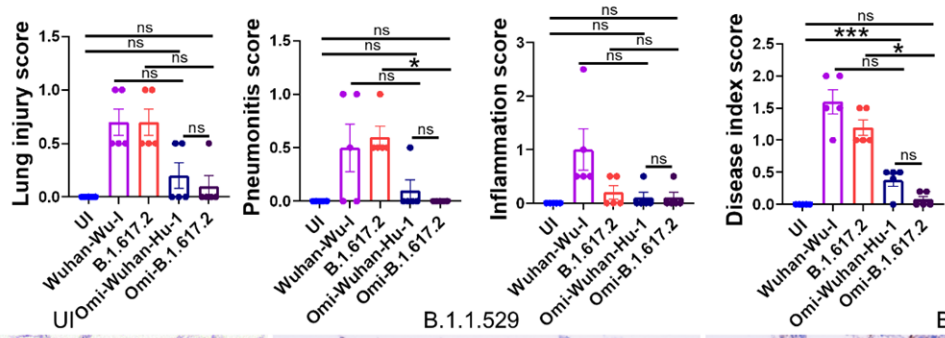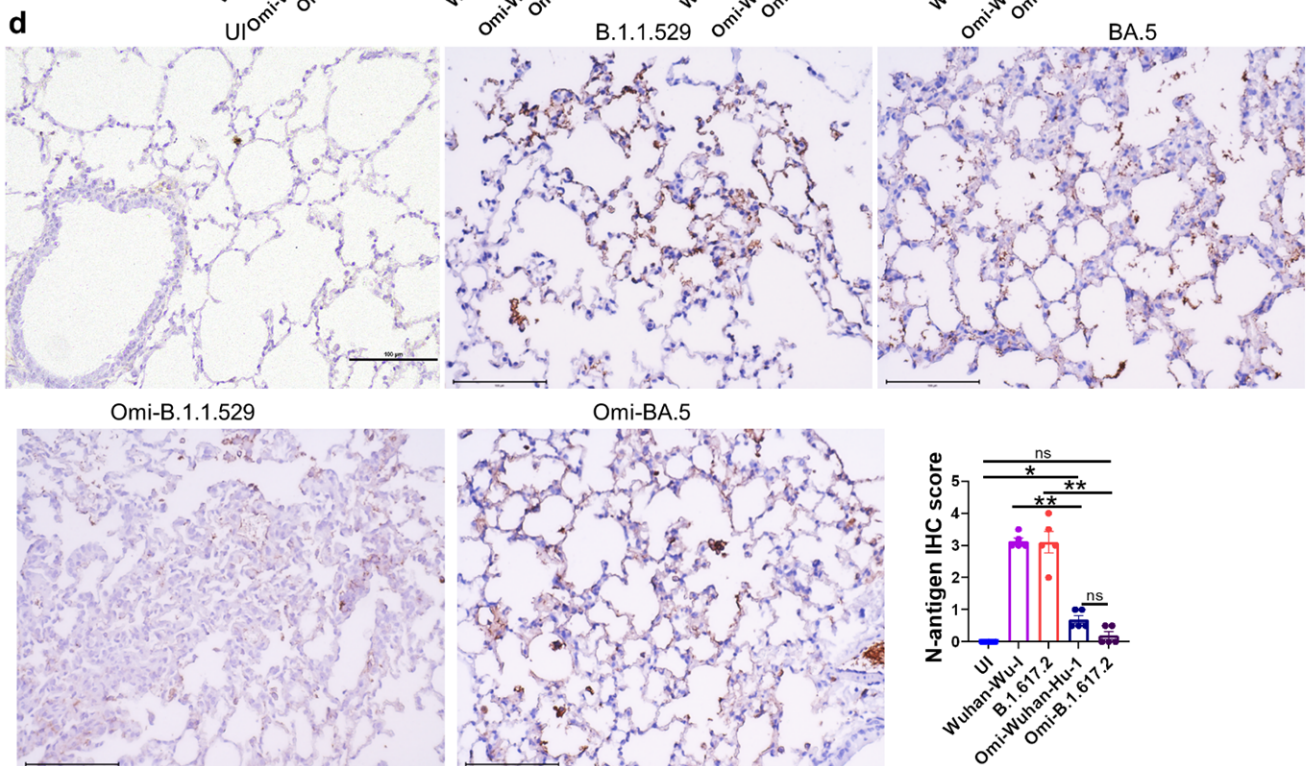

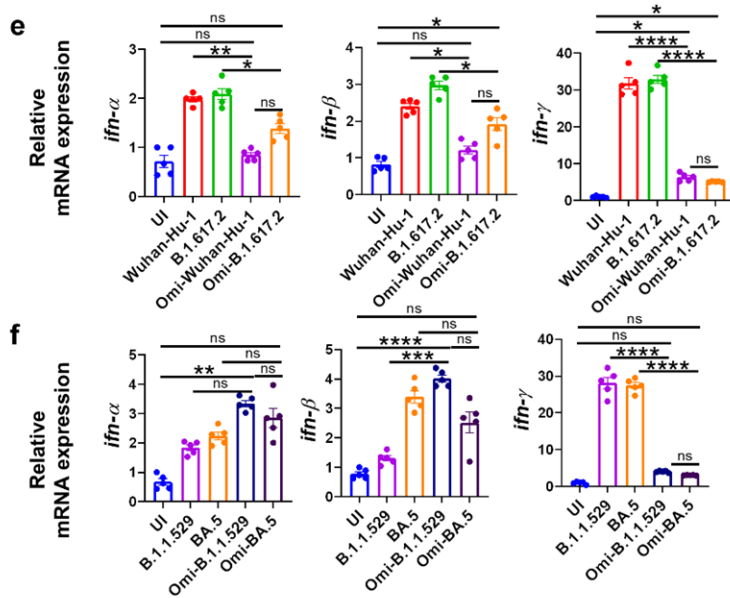

53

54 **Supplement Fig. 6. Histopathological changes and inflammatory cytokine mRNA**  
 55 **expression in the lungs of re-infected mice.** 14 mice post omicron infection was used as  
 56 recovery model for the re-infection studies with different VoCs: (a & b) Wuhan reinfection  
 57 (Omi-Wuhan-Hu-1), B.1.617.2 reinfection (Omi-B.1.617.2), (c & d) B.1.1.529 reinfection  
 58 (Omi-B.1.1.529) and BA.5 reinfection (Omi-BA.5). (a & c) Representative H & E stained  
 59 images of lung section at 40X showing pneumonitis (blue arrow), lung injury (red arrow),  
 60 inflammation (black arrow). Random blind assessment of the HE stained lung sections were  
 61 done by a trained pathologist for different challenge groups and were given pathological scores  
 62 based on a scale 0 to 5 (where 0 meant no feature and 5 meant highest pathological feature). (b  
 63 & d) Representative IHC images for N antigen (black arrow) in the lung sections. Blinded  
 64 scoring of IHC stain by trained pathologist on the scale of 0 to 5 (where 0 meant no stain & 5  
 65 meant highest brown color stain distribution). RNA from the lungs samples from rechallenged  
 66 mice recovered from Omicron infection was used to evaluate the mRNA expression of IFN $\gamma$ ,  
 67 IFN $\alpha$  and IFN $\beta$  genes in (e) Omi-Wuhan-Hu-1 & Omi-B.1.617.2 mice (f) Omi-B.1.1.529 &  
 68 Omi-BA.5 groups. For all experiment n=5. One way-Anova using non-parametric Kruskal-

69 Wallis test for multiple comparison. ns= non-significant, \*P < 0.05, \*\*P < 0.01, \*\*\*P < 0.001,

70 \*\*\*\*P < 0.0001.

71
